# Supplementary material for: Widespread Intra- and Inter-Network Dysconnectivity among Large-Scale Resting State Networks in Schizophrenia
Source: MDPI journal article supplement (doi:10.3390/jcm12093176), 2023-04-28
Supplement: s1 [file s1]

**Table S1.** The partial correlation between the clinical variables and intra- and inter-networks.

|                                 | PANSS_total<br>scores r(P) | PANSS_positive<br>scores r(P) | PANSS_negativ<br>e scores r(P) | PANSS_general<br>scores r(P) | Duration of<br>illness r(P) | CPZ<br>r(P)   |
|---------------------------------|----------------------------|-------------------------------|--------------------------------|------------------------------|-----------------------------|---------------|
| MPFC_l LP                       | -0.005(0.94)               | 0.053(0.465)                  | 0.003(0.968)                   | -0.066(0.361)                | -0.098(0.178)               | 0.006(0.937)  |
| MPFC_r LP                       | -0.086(0.236)              | 0.009(0.898)                  | -0.007(0.927)                  | -0.167(0.02)                 | -0.086(0.236)               | 0.057(0.43)   |
| Anterior<br>lobe_Posterior lobe | -0.065(0.367)              | -0.049(0.498)                 | -0.078(0.284)                  | -0.024(0.743)                | -0.096(0.187)               | -0.015(0.834) |
| MPFC_l LPFC                     | -0.082(0.255)              | -0.041(0.57)                  | -0.047(0.515)                  | -0.095(0.189)                | -0.039(0.591)               | -0.051(0.482) |
| MPFC_r LPFC                     | -0.054(0.458)              | -0.046(0.523)                 | -0.032(0.663)                  | -0.071(0.326)                | -0.069(0.343)               | -0.008(0.913) |
| MPFC_l PPC                      | -0.088(0.225)              | -0.019(0.792)                 | -0.04(0.578)                   | -0.138(0.056)                | -0.138(0.057)               | 0.074(0.306)  |
| MPFC_r PPC                      | -0.098(0.176)              | -0.081(0.267)                 | -0.082(0.261)                  | -0.087(0.233)                | -0.049(0.496)               | 0.041(0.568)  |
| MPFC_dACC                       | 0.043(0.556)               | 0.003(0.969)                  | 0.039(0.594)                   | 0.032(0.662)                 | -0.045(0.534)               | -0.077(0.291) |
| MPFC_l AI                       | 0.02(0.78)                 | -0.077(0.29)                  | 0.071(0.33)                    | 0.05(0.49)                   | 0.142(0.05)                 | -0.001(0.987) |
| MPFC_r AI                       | 0.004(0.957)               | -0.034(0.635)                 | 0.062(0.395)                   | -0.019(0.797)                | 0.109(0.134)                | 0.032(0.659)  |
| MPFC_l RPFC                     | 0.019(0.792)               | -0.017(0.81)                  | 0.047(0.514)                   | -0.018(0.809)                | 0.055(0.451)                | 0.01(0.886)   |
| MPFC_l IPS                      | 0(1)                       | -0.031(0.672)                 | -0.022(0.76)                   | 0.071(0.329)                 | -0.128(0.077)               | -0.029(0.686) |
| MPFC_r IPS                      | -0.024(0.739)              | -0.095(0.192)                 | -0.044(0.542)                  | 0.068(0.348)                 | -0.11(0.13)                 | -0.044(0.547) |
| MPFC_l IFG                      | -0.032(0.663)              | -0.038(0.605)                 | 0.014(0.85)                    | -0.073(0.317)                | 0.073(0.318)                | 0.012(0.864)  |
| PCC_l IFG                       | -0.061(0.4)                | 0.006(0.929)                  | -0.04(0.584)                   | -0.078(0.28)                 | -0.015(0.835)               | 0.001(0.992)  |
| l LP_r IFG                      | 0.084(0.248)               | 0.062(0.39)                   | 0.04(0.585)                    | 0.05(0.488)                  | 0.006(0.929)                | 0.004(0.96)   |
| r LP_r IFG                      | 0.103(0.157)               | 0.044(0.54)                   | 0.115(0.114)                   | 0.02(0.785)                  | -0.052(0.474)               | 0.001(0.993)  |
| l LP_MCC                        | 0.047(0.519)               | -0.035(0.627)                 | 0.096(0.186)                   | 0.035(0.633)                 | 0.039(0.588)                | 0.073(0.317)  |
| r AI_l IPS                      | -0.035(0.63)               | 0.069(0.339)                  | -0.045(0.532)                  | -0.074(0.307)                | -0.147(0.042)               | -0.026(0.722) |
| l AI_l PrG                      | 0.027(0.705)               | 0.096(0.186)                  | 0.035(0.632)                   | -0.051(0.484)                | 0.021(0.768)                | -0.073(0.314) |
| l AI_r PrG                      | 0.024(0.742)               | 0.098(0.178)                  | 0.02(0.783)                    | -0.05(0.488)                 | 0.072(0.324)                | 0.009(0.907)  |
| l AI_MCC                        | 0.015(0.842)               | 0.113(0.118)                  | -0.086(0.236)                  | 0.024(0.737)                 | 0.039(0.589)                | -0.079(0.274) |
| r AI_l PrG                      | 0.106(0.144)               | 0.068(0.351)                  | 0.087(0.232)                   | 0.046(0.524)                 | 0(0.996)                    | 0.05(0.49)    |
| r AI_r PrG                      | 0.051(0.485)               | 0.054(0.46)                   | 0.061(0.4)                     | -0.014(0.844)                | 0.046(0.529)                | 0.121(0.094)  |
| r AI_MCC                        | -0.024(0.737)              | 0.04(0.582)                   | -0.034(0.64)                   | -0.024(0.741)                | 0.022(0.758)                | 0.024(0.744)  |
| l RPFC_l PrG                    | 0.201(0.005)               | 0.071(0.328)                  | 0.2(0.005)                     | 0.15(0.038)                  | -0.003(0.963)               | -0.027(0.713) |
| l RPFC_r PrG                    | 0.152(0.036)               | 0.066(0.36)                   | 0.144(0.047)                   | 0.11(0.128)                  | 0.04(0.581)                 | 0.094(0.194)  |
| l RPFC_MCC                      | 0.124(0.086)               | 0.166(0.022)                  | 0.033(0.648)                   | 0.078(0.281)                 | 0.064(0.379)                | -0.071(0.328) |
| r RPFC_l PrG                    | 0.151(0.036)               | 0.049(0.497)                  | 0.162(0.025)                   | 0.096(0.184)                 | 0.062(0.395)                | 0.047(0.515)  |
| r RPFC_r PrG                    | 0.027(0.711)               | 0.016(0.83)                   | 0.024(0.737)                   | 0.011(0.876)                 | 0.084(0.247)                | 0.13(0.073)   |
| r RPFC_MCC                      | -0.003(0.971)              | 0.085(0.241)                  | -0.023(0.752)                  | -0.018(0.804)                | 0.077(0.286)                | 0.025(0.733)  |
| l SMG_l PrG                     | 0.063(0.387)               | 0.031(0.669)                  | 0.063(0.382)                   | 0.016(0.821)                 | -0.01(0.891)                | 0.162(0.025)  |
| l SMG_r PrG                     | 0.039(0.592)               | -0.011(0.884)                 | 0.088(0.225)                   | -0.015(0.831)                | 0.065(0.369)                | 0.188(0.009)  |
| r AI_r IFG                      | -0.027(0.713)              | 0.05(0.489)                   | -0.002(0.982)                  | -0.059(0.417)                | -0.01(0.891)                | -0.048(0.508) |
| r RPFC_r IFG                    | -0.016(0.826)              | 0.015(0.839)                  | 0.022(0.761)                   | -0.082(0.258)                | 0.031(0.669)                | 0.035(0.626)  |
| l RPFC_Anterior lobe            | -0.014(0.842)              | -0.047(0.519)                 | 0.001(0.987)                   | -0.011(0.885)                | 0.12(0.098)                 | 0.027(0.711)  |
| r RPFC_Anterior lobe            | 0.008(0.908)               | -0.004(0.957)                 | -0.013(0.856)                  | -0.013(0.856)                | 0.057(0.433)                | 0.001(0.985)  |
| MCC_l LPFC                      | -0.038(0.604)              | 0.098(0.175)                  | -0.135(0.062)                  | -0.034(0.637)                | 0.016(0.829)                | 0.09(0.214)   |
| MCC_r IPS                       | 0.061(0.403)               | 0.105(0.147)                  | -0.024(0.745)                  | 0.046(0.528)                 | -0.087(0.23)                | 0.116(0.109)  |

**Abbreviations:** l, left; r, right; MPFC, medial prefrontal cortex; LP, lateral parietal; LPFC, lateral prefrontal

cortex; PPC, posterior parietal cortex; AI, anterior insula; RPFC, rostral prefrontal cortex; IPS, intraparietal sulcus; PCC, posterior cingulate cortex; IFG, inferior frontal gyrus; FEF, frontal eyes field; dACC, dorsal anterior cingulate cortex; SMG, supramarginal gyrus, MCC, middle cingulate cortex; PrG, precentral gyrus; PANSS, positive and negative symptom scale; PANSS\_positive scores, positive symptoms scores; PANSS\_negative scores, positive symptoms scores; PANSS\_general scores, general psychopathology symptoms scores; CPZ, chlorpromazine equivalents.

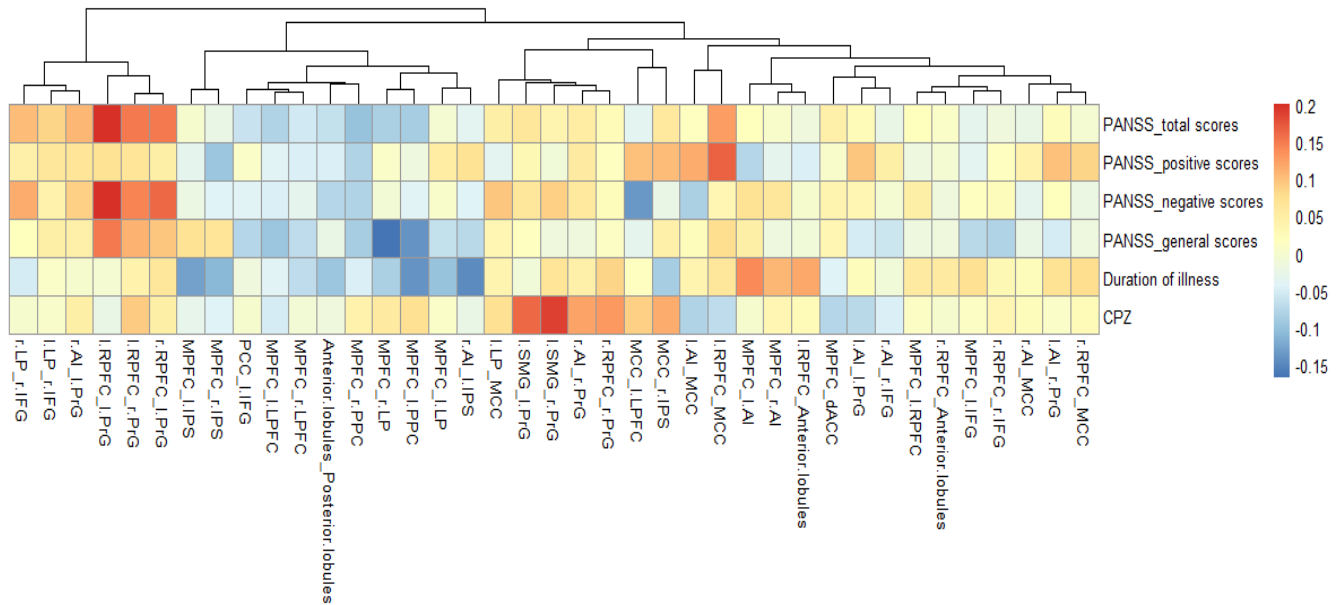

**Figure S1.** The heatmap of the partial correlation between the clinical variables and intra- and inter-networks. Abbreviations: l, left; r, right; MPFC, medial prefrontal cortex; LP, lateral parietal; LPFC, lateral prefrontal cortex; PPC, posterior parietal cortex; AI, anterior insula; RPFC, rostral prefrontal cortex; IPS, intraparietal sulcus; PCC, posterior cingulate cortex; IFG, inferior frontal gyrus; FEF, frontal eyes field; dACC, dorsal anterior cingulate cortex; SMG, supramarginal gyrus, MCC, middle cingulate cortex; PrG, precentral gyrus; PANSS, positive and negative symptom scale; PANSS\_positive scores, positive symptoms scores; PANSS\_negative scores, positive symptoms scores; PANSS\_general scores, general psychopathology symptoms scores; CPZ, chlorpromazine equivalents.
